# Supplementary material
Source: MDPI journal article supplement (https://www.mdpi.com/2073-4433/12/12/1598)
Supplement: s1 [file s1]

# Supplementary Materials: Spatial and Temporal Distribution Characteristics and Source Apportionment of VOCs in Lian-yungang City in 2018

Cheng Chen <sup>1,2,\*</sup>, Lingrui Wang <sup>3</sup>, Yunjiang Zhang <sup>3,4</sup>, Shanshan Zheng <sup>3</sup> and Lili Tang <sup>3</sup>

**Table S1.** PCA analysis of VOCs at Supersite

| VOCs species            | Factor           |                            |                 |            |                          |
|-------------------------|------------------|----------------------------|-----------------|------------|--------------------------|
|                         | Factor 1         | Factor 2                   | Factor 3        | Factor 4   | Factor 5                 |
| Ethane                  |                  |                            |                 | .798       |                          |
| Propane                 | .417             |                            |                 | .432       |                          |
| Isobutane               | .931             |                            |                 |            |                          |
| n-Butane                | .899             |                            |                 |            |                          |
| Isopentane              | .845             |                            |                 |            |                          |
| n-Pentane               | .930             |                            |                 |            |                          |
| n-Hexane                |                  |                            | .507            |            |                          |
| Ethylene                |                  |                            |                 | .833       |                          |
| Propylene               |                  |                            |                 |            | .895                     |
| Isoprene                |                  | .629                       |                 |            |                          |
| Acetylene               |                  |                            |                 | .789       |                          |
| Benzene                 | .654             |                            | .596            |            |                          |
| Toluene                 |                  |                            | .706            |            |                          |
| Ethylbenzene            |                  | .495                       | .721            |            |                          |
| m/p-Xylene              |                  | .655                       | .643            |            |                          |
| Styrene                 |                  | .727                       |                 |            |                          |
| 1,3,5-Trimethylbenzene  |                  | .923                       |                 |            |                          |
| 1,2,4- Trimethylbenzene |                  | .866                       |                 |            |                          |
| 1,2,3- Trimethylbenzene |                  | .727                       |                 |            |                          |
| Variance contribution   |                  |                            |                 |            |                          |
| (%)                     | 26.82            | 23.42                      | 11.15           | 6.85       | 6.14                     |
| Sources                 | Fuel evaporation | Industrial emissions+plans | Vehicle exhaust | Combustion | Industrial raw materials |

Extraction method: principal component analysis; rotation method: maximum variation method with Kaiser normalization; rotation convergence of four iterations.

**Table S2.** PCA analysis of VOCs at MDI

| VOCs species | Factor   |          |          |          |          |
|--------------|----------|----------|----------|----------|----------|
|              | Factor 1 | Factor 2 | Factor 3 | Factor 4 | Factor 5 |

|                         |             |                |         |            |                |
|-------------------------|-------------|----------------|---------|------------|----------------|
| Ethane                  |             |                |         | .942       |                |
| Propane                 | .509        |                |         | .442       |                |
| Isobutane               | .951        |                |         |            |                |
| n-Butane                | .933        |                |         |            |                |
| Isopentane              | .850        |                |         |            |                |
| n-Pentane               | .873        |                |         |            |                |
| n-Hexane                |             |                |         |            | .838           |
| Ethylene                |             |                |         |            |                |
| Propylene               |             |                |         |            | .766           |
| Isoprene                |             | .654           | .387    |            |                |
| Acetylene               |             |                |         | .934       |                |
| Benzene                 | .697        |                | .479    |            |                |
| Toluene                 | .558        |                | .575    |            |                |
| Ethylbenzene            |             |                | .880    |            |                |
| m/p-Xylene              |             |                | .908    |            |                |
| Styrene                 |             | .496           |         |            |                |
| 1,3,5-Trimethylbenzene  |             | .960           |         |            |                |
| 1,2,4- Trimethylbenzene |             | .941           |         |            |                |
| 1,2,3- Trimethylbenzene |             | .492           | .412    |            |                |
| Variance contribution   |             |                |         |            |                |
| (%)                     | 26.25       | 21.02          | 10.98   | 9.28       | 7.38           |
|                         |             | Industrial     |         |            |                |
| Sources                 | Fuel        | emissions+plan | Vehicle |            | Industrial raw |
|                         | evaporation | ts             | exhaust | Combustion | materials      |

Extraction method: principal component analysis; rotation method: maximum variation method with Kaiser normalization; rotation convergence of 7 iterations.

**Table S3.** PCA analysis of VOCs at DY

| VOCs species | Factor   |          |          |          |
|--------------|----------|----------|----------|----------|
|              | Factor 1 | Factor 2 | Factor 3 | Factor 4 |
| Ethane       |          |          |          |          |
| Propane      |          | .932     |          |          |
| Isobutane    |          | .669     |          | .489     |
| n-Butane     |          | .753     |          | .498     |
| Isopentane   |          |          | .942     |          |
| n-Pentane    |          | .733     |          | .641     |
| n-Hexane     | .607     | .492     |          |          |
| Ethylene     |          |          | .793     |          |
| Propylene    | .918     |          |          |          |

|                         |                  |         |            |                  |
|-------------------------|------------------|---------|------------|------------------|
| Isoprene                | .800             |         |            |                  |
| Acetylene               |                  |         | .740       |                  |
| Benzene                 |                  | .950    |            |                  |
| Toluene                 | .942             |         |            |                  |
| Ethylbenzene            | .805             | .462    |            |                  |
| m/p-Xylene              | .953             |         |            |                  |
| Styrene                 |                  | .861    |            |                  |
| 1,3,5-Trimethylbenzene  | .816             |         |            |                  |
| 1,2,4- Trimethylbenzene | .909             |         |            |                  |
| 1,2,3- Trimethylbenzene | .409             | .884    |            |                  |
| Variance contribution   |                  |         |            |                  |
| (%)                     | 39.49            | 30.59   | 14.33      | 7.36             |
|                         | Industrial       | Vehicle |            |                  |
| Sources                 | emissions+plants | exhaust | Combustion | Fuel evaporation |

Extraction method: principal component analysis; rotation method: maximum variation method with Kaiser normalization; rotation convergence of 16 iterations.

**Table S4.** PCA analysis of VOCs at HG

| VOCs species            | Factor   |          |          |          |          |
|-------------------------|----------|----------|----------|----------|----------|
|                         | Factor 1 | Factor 2 | Factor 3 | Factor 4 | Factor 5 |
| Ethane                  |          |          | .812     |          |          |
| Propane                 |          | .752     |          |          |          |
| Isobutane               |          | .801     |          |          |          |
| n-Butane                |          | .808     |          |          |          |
| Isopentane              |          | .879     |          |          |          |
| n-Pentane               |          | .840     |          |          |          |
| n-Hexane                |          |          |          |          | .870     |
| Ethylene                |          |          | .876     |          |          |
| Propylene               | .432     |          | .439     |          |          |
| Isoprene                | .839     |          |          |          |          |
| Acetylene               |          |          | .825     |          |          |
| Benzene                 |          | .543     |          | .468     |          |
| Toluene                 | .428     |          |          | .616     |          |
| Ethylbenzene            |          |          |          | .795     |          |
| m/p-Xylene              | .634     |          |          | .615     |          |
| Styrene                 | .686     |          |          |          |          |
| 1,3,5-Trimethylbenzene  | .874     |          |          |          |          |
| 1,2,4- Trimethylbenzene | .813     |          |          |          |          |
| 1,2,3- Trimethylbenzene | .619     |          |          |          |          |

| Variance contribution |                  |             |            |         |               |
|-----------------------|------------------|-------------|------------|---------|---------------|
| (%)                   | 26.8             | 21.42       | 13.34      | 7.31    | 6.26          |
|                       | Industrial       | Fuel        |            | Vehicle |               |
| Sources               | emissions+plants | evaporation | Combustion | exhaust | Solvent usage |

Extraction method: principal component analysis; rotation method: maximum variation method with Kaiser normalization; rotation convergence of 6 iterations.

**Table S5.** PCA analysis of VOCs at YHB

| VOCs species            | Factor         |             |          |            |               |
|-------------------------|----------------|-------------|----------|------------|---------------|
|                         | Factor 1       | Factor 2    | Factor 3 | Factor 4   | Factor 5      |
| Ethane                  |                |             |          | .913       |               |
| Propane                 |                | .686        |          |            | .429          |
| Isobutane               |                | .881        |          |            |               |
| n-Butane                |                | .756        | .435     |            |               |
| Isopentane              |                | .843        |          |            |               |
| n-Pentane               |                | .831        |          |            |               |
| n-Hexane                |                |             |          |            | .760          |
| Ethylene                |                |             |          | .728       |               |
| Propylene               |                |             | .729     |            |               |
| Isoprene                | .873           |             |          |            |               |
| Acetylene               |                |             |          | .816       |               |
| Benzene                 |                | .577        | .527     |            |               |
| Toluene                 |                |             | .768     |            |               |
| Ethylbenzene            |                |             | .859     |            |               |
| m/p-Xylene              | .607           |             | .654     |            |               |
| Styrene                 | .706           |             |          |            |               |
| 1,3,5-Trimethylbenzene  | .899           |             |          |            |               |
| 1,2,4- Trimethylbenzene | .814           |             |          |            |               |
| 1,2,3- Trimethylbenzene | .738           |             |          |            |               |
| Variance contribution   |                |             |          |            |               |
| (%)                     | 27.71          | 24.14       | 11.04    | 7.62       | 5.89          |
|                         | Industrial     |             |          |            |               |
|                         | emissions+plan | Fuel        | Vehicle  |            |               |
| Sources                 | ts             | evaporation | exhaust  | Combustion | Solvent usage |

Extraction method: principal component analysis; rotation method: maximum variation method with Kaiser normalization; rotation convergence of 6 iterations.
